# Supplementary material for: Analytic and Holistic Thinkers: Differences in the Dynamics of Heart Rate Complexity When Solving a Cognitive Task in Field-Dependent and Field-Independent Conditions
Source: Front Psychol. 2021 Nov 26;12:762225. doi: 10.3389/fpsyg.2021.762225 (PMC8661497; doi:10.3389/fpsyg.2021.762225)
Supplement: Supplementary file 2 [file Table_1.XLSX]

## Sheet: Table_1
id_participant	Response time (ms)	group	task
2	761.772	Holistic group	Analytic task 1
8	727.536	Holistic group	Analytic task 1
9	1109.2	Holistic group	Analytic task 1
10	614.93	Holistic group	Analytic task 1
11	711.054	Holistic group	Analytic task 1
13	757.912	Holistic group	Analytic task 1
14	712.877	Holistic group	Analytic task 1
16	880.862	Holistic group	Analytic task 1
18	846.362	Holistic group	Analytic task 1
19	766.632	Holistic group	Analytic task 1
20	741.368	Holistic group	Analytic task 1
23	815.638	Holistic group	Analytic task 1
25	479.2	Holistic group	Analytic task 1
27	628.982	Holistic group	Analytic task 1
30	709.304	Holistic group	Analytic task 1
34	321.684	Holistic group	Analytic task 1
37	474.643	Holistic group	Analytic task 1
38	928.554	Holistic group	Analytic task 1
39	461.768	Holistic group	Analytic task 1
41	402.034	Holistic group	Analytic task 1
43	809.776	Holistic group	Analytic task 1
45	759.536	Holistic group	Analytic task 1
47	1134.95	Holistic group	Analytic task 1
2	519.582	Holistic group	Analytic task 2
8	773.8	Holistic group	Analytic task 2
9	686.947	Holistic group	Analytic task 2
10	479.86	Holistic group	Analytic task 2
11	603.61	Holistic group	Analytic task 2
13	532.754	Holistic group	Analytic task 2
14	575.298	Holistic group	Analytic task 2
16	746.345	Holistic group	Analytic task 2
18	552.655	Holistic group	Analytic task 2
19	634.351	Holistic group	Analytic task 2
20	718.31	Holistic group	Analytic task 2
23	790.155	Holistic group	Analytic task 2
25	341.714	Holistic group	Analytic task 2
27	592.436	Holistic group	Analytic task 2
30	616.018	Holistic group	Analytic task 2
34	410.071	Holistic group	Analytic task 2
37	467.525	Holistic group	Analytic task 2
38	933.508	Holistic group	Analytic task 2
39	565.071	Holistic group	Analytic task 2
41	378.054	Holistic group	Analytic task 2
43	784	Holistic group	Analytic task 2
45	579.273	Holistic group	Analytic task 2
47	550.263	Holistic group	Analytic task 2
2	489.912	Holistic group	Holistic task 1
8	701.911	Holistic group	Holistic task 1
9	616.309	Holistic group	Holistic task 1
10	493.911	Holistic group	Holistic task 1
11	698.518	Holistic group	Holistic task 1
13	668.655	Holistic group	Holistic task 1
14	657.719	Holistic group	Holistic task 1
16	817.632	Holistic group	Holistic task 1
18	585.105	Holistic group	Holistic task 1
19	918.121	Holistic group	Holistic task 1
20	761.054	Holistic group	Holistic task 1
23	866.193	Holistic group	Holistic task 1
25	472.119	Holistic group	Holistic task 1
27	594.339	Holistic group	Holistic task 1
30	674.911	Holistic group	Holistic task 1
34	532.179	Holistic group	Holistic task 1
37	510.534	Holistic group	Holistic task 1
38	650.411	Holistic group	Holistic task 1
39	683.035	Holistic group	Holistic task 1
41	415.446	Holistic group	Holistic task 1
43	622.655	Holistic group	Holistic task 1
45	847.255	Holistic group	Holistic task 1
2	534.393	Holistic group	Holistic task 2
8	628	Holistic group	Holistic task 2
9	670.982	Holistic group	Holistic task 2
10	466.304	Holistic group	Holistic task 2
11	513.143	Holistic group	Holistic task 2
13	440.912	Holistic group	Holistic task 2
14	612.768	Holistic group	Holistic task 2
16	636.982	Holistic group	Holistic task 2
18	507.519	Holistic group	Holistic task 2
19	674.862	Holistic group	Holistic task 2
20	738.763	Holistic group	Holistic task 2
23	835.786	Holistic group	Holistic task 2
25	426.695	Holistic group	Holistic task 2
27	543.158	Holistic group	Holistic task 2
30	539.017	Holistic group	Holistic task 2
34	508.155	Holistic group	Holistic task 2
37	435.825	Holistic group	Holistic task 2
38	715.877	Holistic group	Holistic task 2
39	528.276	Holistic group	Holistic task 2
41	384.382	Holistic group	Holistic task 2
43	592.982	Holistic group	Holistic task 2
45	756.946	Holistic group	Holistic task 2
1	921.224	Analytic group	Analytic task 1
3	1095.77	Analytic group	Analytic task 1
5	777.017	Analytic group	Analytic task 1
6	825.929	Analytic group	Analytic task 1
7	796.797	Analytic group	Analytic task 1
15	975.041	Analytic group	Analytic task 1
21	727.293	Analytic group	Analytic task 1
22	731.929	Analytic group	Analytic task 1
24	1286.69	Analytic group	Analytic task 1
28	910.103	Analytic group	Analytic task 1
29	1004.22	Analytic group	Analytic task 1
31	598.825	Analytic group	Analytic task 1
32	814.696	Analytic group	Analytic task 1
33	900.509	Analytic group	Analytic task 1
35	740.321	Analytic group	Analytic task 1
36	569.754	Analytic group	Analytic task 1
40	994.226	Analytic group	Analytic task 1
42	969.352	Analytic group	Analytic task 1
44	594.912	Analytic group	Analytic task 1
46	490.276	Analytic group	Analytic task 1
48	565.356	Analytic group	Analytic task 1
50	789.842	Analytic group	Analytic task 1
51	1085.82	Analytic group	Analytic task 1
52	1091.69	Analytic group	Analytic task 1
1	1114.19	Analytic group	Analytic task 2
3	1060.68	Analytic group	Analytic task 2
5	632.914	Analytic group	Analytic task 2
6	613.263	Analytic group	Analytic task 2
7	740.333	Analytic group	Analytic task 2
15	885.691	Analytic group	Analytic task 2
21	466.857	Analytic group	Analytic task 2
22	572.123	Analytic group	Analytic task 2
24	1032.79	Analytic group	Analytic task 2
28	838.875	Analytic group	Analytic task 2
29	823.561	Analytic group	Analytic task 2
31	568.439	Analytic group	Analytic task 2
32	629.286	Analytic group	Analytic task 2
33	599.286	Analytic group	Analytic task 2
35	755.569	Analytic group	Analytic task 2
36	555.071	Analytic group	Analytic task 2
40	822.207	Analytic group	Analytic task 2
42	795.789	Analytic group	Analytic task 2
44	608.845	Analytic group	Analytic task 2
46	455.821	Analytic group	Analytic task 2
48	506.69	Analytic group	Analytic task 2
50	467.737	Analytic group	Analytic task 2
51	914.259	Analytic group	Analytic task 2
52	725.947	Analytic group	Analytic task 2
1	919.316	Analytic group	Holistic task 1
3	787.054	Analytic group	Holistic task 1
5	975.807	Analytic group	Holistic task 1
6	556.614	Analytic group	Holistic task 1
7	1035.21	Analytic group	Holistic task 1
15	1245.22	Analytic group	Holistic task 1
21	667.316	Analytic group	Holistic task 1
22	608.582	Analytic group	Holistic task 1
24	899.559	Analytic group	Holistic task 1
28	795.571	Analytic group	Holistic task 1
29	763.071	Analytic group	Holistic task 1
31	573.983	Analytic group	Holistic task 1
32	741.107	Analytic group	Holistic task 1
33	897.982	Analytic group	Holistic task 1
35	830.893	Analytic group	Holistic task 1
36	547.211	Analytic group	Holistic task 1
40	880.772	Analytic group	Holistic task 1
42	751.614	Analytic group	Holistic task 1
44	718.053	Analytic group	Holistic task 1
46	463.5	Analytic group	Holistic task 1
48	744.474	Analytic group	Holistic task 1
50	542.845	Analytic group	Holistic task 1
51	897.316	Analytic group	Holistic task 1
52	923.638	Analytic group	Holistic task 1
1	895.862	Analytic group	Holistic task 2
3	979.263	Analytic group	Holistic task 2
5	750.053	Analytic group	Holistic task 2
6	563.316	Analytic group	Holistic task 2
7	744.143	Analytic group	Holistic task 2
15	925.321	Analytic group	Holistic task 2
22	581.466	Analytic group	Holistic task 2
24	606.545	Analytic group	Holistic task 2
28	844.196	Analytic group	Holistic task 2
29	698.964	Analytic group	Holistic task 2
31	538.625	Analytic group	Holistic task 2
32	650.143	Analytic group	Holistic task 2
33	739.661	Analytic group	Holistic task 2
35	652.203	Analytic group	Holistic task 2
36	493.576	Analytic group	Holistic task 2
40	645.073	Analytic group	Holistic task 2
42	797.897	Analytic group	Holistic task 2
44	668.536	Analytic group	Holistic task 2
46	449.054	Analytic group	Holistic task 2
48	573.929	Analytic group	Holistic task 2
50	457.491	Analytic group	Holistic task 2
51	828.071	Analytic group	Holistic task 2
52	822.525	Analytic group	Holistic task 2

## Sheet: Table_2
id_participant	Success rate	group	task
2	0.4	Holistic group	Analytic task 1
8	0.745763	Holistic group	Analytic task 1
9	0.696429	Holistic group	Analytic task 1
10	0.440678	Holistic group	Analytic task 1
11	0.8	Holistic group	Analytic task 1
13	0.627119	Holistic group	Analytic task 1
14	0.833333	Holistic group	Analytic task 1
16	0.333333	Holistic group	Analytic task 1
18	0.85	Holistic group	Analytic task 1
19	0.666667	Holistic group	Analytic task 1
20	0.816667	Holistic group	Analytic task 1
23	0.733333	Holistic group	Analytic task 1
25	0.949153	Holistic group	Analytic task 1
27	0.898305	Holistic group	Analytic task 1
30	0.916667	Holistic group	Analytic task 1
34	0.433333	Holistic group	Analytic task 1
37	0.75	Holistic group	Analytic task 1
38	0.416667	Holistic group	Analytic task 1
39	0.05	Holistic group	Analytic task 1
41	0.783333	Holistic group	Analytic task 1
43	0.616667	Holistic group	Analytic task 1
45	0.983333	Holistic group	Analytic task 1
47	0.711864	Holistic group	Analytic task 1
2	0.333333	Holistic group	Analytic task 2
8	0.79661	Holistic group	Analytic task 2
9	1	Holistic group	Analytic task 2
10	0.85	Holistic group	Analytic task 2
11	0.85	Holistic group	Analytic task 2
13	0.896552	Holistic group	Analytic task 2
14	0.79661	Holistic group	Analytic task 2
16	0.305085	Holistic group	Analytic task 2
18	0.983333	Holistic group	Analytic task 2
19	0.683333	Holistic group	Analytic task 2
20	0.866667	Holistic group	Analytic task 2
23	0.85	Holistic group	Analytic task 2
25	0.85	Holistic group	Analytic task 2
27	0.898305	Holistic group	Analytic task 2
30	0.779661	Holistic group	Analytic task 2
34	0.525424	Holistic group	Analytic task 2
37	0.783333	Holistic group	Analytic task 2
38	0.716667	Holistic group	Analytic task 2
39	0.583333	Holistic group	Analytic task 2
41	0.983333	Holistic group	Analytic task 2
43	0.5	Holistic group	Analytic task 2
45	0.949153	Holistic group	Analytic task 2
47	1	Holistic group	Analytic task 2
2	0.916667	Holistic group	Holistic task 1
8	0.948276	Holistic group	Holistic task 1
9	0.949153	Holistic group	Holistic task 1
10	0.783333	Holistic group	Holistic task 1
11	0.847458	Holistic group	Holistic task 1
13	0.933333	Holistic group	Holistic task 1
14	0.833333	Holistic group	Holistic task 1
16	0.915254	Holistic group	Holistic task 1
18	0.966667	Holistic group	Holistic task 1
19	0.833333	Holistic group	Holistic task 1
20	0.983051	Holistic group	Holistic task 1
23	0.85	Holistic group	Holistic task 1
25	0.933333	Holistic group	Holistic task 1
27	0.95	Holistic group	Holistic task 1
30	0.95	Holistic group	Holistic task 1
34	0.866667	Holistic group	Holistic task 1
37	0.933333	Holistic group	Holistic task 1
38	0.916667	Holistic group	Holistic task 1
39	0.915254	Holistic group	Holistic task 1
41	0.966667	Holistic group	Holistic task 1
43	0.95	Holistic group	Holistic task 1
45	0.833333	Holistic group	Holistic task 1
2	0.916667	Holistic group	Holistic task 2
8	0.965517	Holistic group	Holistic task 2
9	0.966667	Holistic group	Holistic task 2
10	0.881356	Holistic group	Holistic task 2
11	0.898305	Holistic group	Holistic task 2
13	0.847458	Holistic group	Holistic task 2
14	0.862069	Holistic group	Holistic task 2
16	0.933333	Holistic group	Holistic task 2
18	0.949153	Holistic group	Holistic task 2
19	0.9	Holistic group	Holistic task 2
20	0.983333	Holistic group	Holistic task 2
23	0.866667	Holistic group	Holistic task 2
25	0.916667	Holistic group	Holistic task 2
27	0.95	Holistic group	Holistic task 2
30	0.966667	Holistic group	Holistic task 2
34	0.915254	Holistic group	Holistic task 2
37	1	Holistic group	Holistic task 2
38	0.883333	Holistic group	Holistic task 2
39	0.916667	Holistic group	Holistic task 2
41	0.95	Holistic group	Holistic task 2
43	0.983333	Holistic group	Holistic task 2
45	0.866667	Holistic group	Holistic task 2
1	0.457627	Analytic group	Analytic task 1
3	0.457627	Analytic group	Analytic task 1
5	0.983333	Analytic group	Analytic task 1
6	0.741379	Analytic group	Analytic task 1
7	0.333333	Analytic group	Analytic task 1
15	0.882353	Analytic group	Analytic task 1
21	0.95	Analytic group	Analytic task 1
22	0.766667	Analytic group	Analytic task 1
24	0.316667	Analytic group	Analytic task 1
28	0.5	Analytic group	Analytic task 1
29	0.866667	Analytic group	Analytic task 1
31	0.95	Analytic group	Analytic task 1
32	0.813559	Analytic group	Analytic task 1
33	0.881356	Analytic group	Analytic task 1
35	0.576271	Analytic group	Analytic task 1
36	0.2	Analytic group	Analytic task 1
40	0.482143	Analytic group	Analytic task 1
42	0.842105	Analytic group	Analytic task 1
44	0.866667	Analytic group	Analytic task 1
46	0.85	Analytic group	Analytic task 1
48	0.3	Analytic group	Analytic task 1
50	0.833333	Analytic group	Analytic task 1
51	0.6	Analytic group	Analytic task 1
52	0.566667	Analytic group	Analytic task 1
1	0.5	Analytic group	Analytic task 2
3	0.844828	Analytic group	Analytic task 2
5	0.683333	Analytic group	Analytic task 2
6	0.762712	Analytic group	Analytic task 2
7	0.327586	Analytic group	Analytic task 2
15	0.964912	Analytic group	Analytic task 2
21	0.966667	Analytic group	Analytic task 2
22	0.816667	Analytic group	Analytic task 2
24	0.271186	Analytic group	Analytic task 2
28	0.576271	Analytic group	Analytic task 2
29	0.833333	Analytic group	Analytic task 2
31	0.9	Analytic group	Analytic task 2
32	0.859649	Analytic group	Analytic task 2
33	0.966667	Analytic group	Analytic task 2
35	0.616667	Analytic group	Analytic task 2
36	0.266667	Analytic group	Analytic task 2
40	0.55	Analytic group	Analytic task 2
42	0.966667	Analytic group	Analytic task 2
44	0.883333	Analytic group	Analytic task 2
46	0.8	Analytic group	Analytic task 2
48	0.766667	Analytic group	Analytic task 2
50	0.716667	Analytic group	Analytic task 2
51	0.816667	Analytic group	Analytic task 2
52	0.633333	Analytic group	Analytic task 2
1	0.883333	Analytic group	Holistic task 1
3	0.623377	Analytic group	Holistic task 1
5	0.566667	Analytic group	Holistic task 1
6	0.95	Analytic group	Holistic task 1
7	0.603448	Analytic group	Holistic task 1
15	0.955556	Analytic group	Holistic task 1
21	0.932203	Analytic group	Holistic task 1
22	0.783333	Analytic group	Holistic task 1
24	0.85	Analytic group	Holistic task 1
28	0.741379	Analytic group	Holistic task 1
29	0.949153	Analytic group	Holistic task 1
31	0.95	Analytic group	Holistic task 1
32	0.983333	Analytic group	Holistic task 1
33	0.933333	Analytic group	Holistic task 1
35	0.830508	Analytic group	Holistic task 1
36	0.983051	Analytic group	Holistic task 1
40	0.932203	Analytic group	Holistic task 1
42	0.916667	Analytic group	Holistic task 1
44	0.916667	Analytic group	Holistic task 1
46	0.983333	Analytic group	Holistic task 1
48	0.883333	Analytic group	Holistic task 1
50	0.8	Analytic group	Holistic task 1
51	0.683333	Analytic group	Holistic task 1
52	0.866667	Analytic group	Holistic task 1
1	0.933333	Analytic group	Holistic task 2
3	0.847458	Analytic group	Holistic task 2
5	0.85	Analytic group	Holistic task 2
6	0.933333	Analytic group	Holistic task 2
7	0.916667	Analytic group	Holistic task 2
15	0.982759	Analytic group	Holistic task 2
22	0.883333	Analytic group	Holistic task 2
24	0.983051	Analytic group	Holistic task 2
28	0.813559	Analytic group	Holistic task 2
29	0.949153	Analytic group	Holistic task 2
31	0.932203	Analytic group	Holistic task 2
32	0.966667	Analytic group	Holistic task 2
33	0.966667	Analytic group	Holistic task 2
35	0.75	Analytic group	Holistic task 2
36	0.916667	Analytic group	Holistic task 2
40	0.966102	Analytic group	Holistic task 2
42	0.916667	Analytic group	Holistic task 2
44	0.85	Analytic group	Holistic task 2
46	0.966667	Analytic group	Holistic task 2
48	0.95	Analytic group	Holistic task 2
50	0.933333	Analytic group	Holistic task 2
51	0.677966	Analytic group	Holistic task 2
52	0.9	Analytic group	Holistic task 2

## Sheet: Table_3
id_participant	stage	group	av_RR (ms)	SDNN (ms)	SampEn
2	rest	holistic group	1229.9	199.528	1.38094
8	rest	holistic group	829.337	105.73	1.48194
9	rest	holistic group	716.552	34.1565	1.92038
10	rest	holistic group	665.295	25.7546	1.52542
11	rest	holistic group	809.459	71.1963	1.12982
16	rest	holistic group	826.05	76.5716	1.32836
18	rest	holistic group	864.477	58.0339	1.73744
19	rest	holistic group	707.42	51.5889	1.63737
20	rest	holistic group	771.637	28.6506	1.60442
23	rest	holistic group	684.68	34.3758	1.78401
25	rest	holistic group	785.872	125.192	1.27193
27	rest	holistic group	665.688	105.568	0.528029
30	rest	holistic group	643.24	26.6198	1.14203
34	rest	holistic group	736.796	64.7197	1.39891
37	rest	holistic group	689.571	23.954	0.995528
38	rest	holistic group	832.825	45.2384	1.54711
39	rest	holistic group	680.183	64.0043	1.17589
41	rest	holistic group	719.028	44.4928	1.45189
43	rest	holistic group	470.173	11.9722	1.16556
45	rest	holistic group	833.148	46.9872	1.64866
47	rest	holistic group	848.955	81.8002	1.16681
1	rest	analytic group	796	41.6251	1.47331
3	rest	analytic group	910.824	28.8488	1.62024
5	rest	analytic group	918.566	91.7358	1.46479
6	rest	analytic group	732.743	70.3687	1.56688
21	rest	analytic group	1065.88	80.7702	1.55463
22	rest	analytic group	691.095	48.9935	1.06408
24	rest	analytic group	667.186	88.44	0.789839
28	rest	analytic group	754.374	38.1472	1.67888
29	rest	analytic group	834.614	37.311	1.35929
31	rest	analytic group	775.418	38.4469	1.51466
32	rest	analytic group	798.453	49.6761	1.4062
33	rest	analytic group	714.892	57.6274	1.51433
35	rest	analytic group	729.415	47.9836	1.04519
36	rest	analytic group	781.611	109.488	1.05337
40	rest	analytic group	712.712	32.1756	1.55329
42	rest	analytic group	684.459	36.8279	1.34799
44	rest	analytic group	726.317	39.2819	2.04721
46	rest	analytic group	796.789	56.6386	1.84177
48	rest	analytic group	661.711	34.3631	1.23544
50	rest	analytic group	758.566	44.9446	1.4813
51	rest	analytic group	828.647	36.5835	1.83361
52	rest	analytic group	1098.99	80.6115	2.1427
2	motor task	holistic group	1128.35	61.4443	1.69168
8	motor task	holistic group	785.72	97.8281	1.6614
9	motor task	holistic group	698.077	41.7816	1.25934
10	motor task	holistic group	608.031	31.0752	1.67398
11	motor task	holistic group	942.815	57.1435	1.56218
16	motor task	holistic group	818.108	43.7248	2.41293
18	motor task	holistic group	960.564	36.2887	1.335
19	motor task	holistic group	680.807	45.6975	1.40118
20	motor task	holistic group	739.12	29.0709	1.32914
23	motor task	holistic group	694.631	29.4803	1.8563
25	motor task	holistic group	807.832	156.579	1.19116
27	motor task	holistic group	733.234	150.098	0.449008
30	motor task	holistic group	640.496	14.602	1.54756
34	motor task	holistic group	731.472	55.4368	2.30259
37	motor task	holistic group	778.545	23.7019	2.05645
38	motor task	holistic group	749.412	48.1866	1.74691
39	motor task	holistic group	738.077	65.9178	1.49327
41	motor task	holistic group	679.857	38.1667	3.07578
43	motor task	holistic group	469.22	16.3902	1.24639
45	motor task	holistic group	827.872	75.0018	2.52573
47	motor task	holistic group	864.933	98.811	1.27418
1	motor task	analytic group	749.437	51.2674	2.00533
3	motor task	analytic group	920.612	55.0826	1.27123
5	motor task	analytic group	849.826	79.9129	1.5724
6	motor task	analytic group	596.682	41.6507	1.11822
21	motor task	analytic group	949.667	58.1625	1.47331
22	motor task	analytic group	722.618	36.8859	2.19722
24	motor task	analytic group	597.984	65.2153	1.28729
28	motor task	analytic group	798.433	46.8315	1.62314
29	motor task	analytic group	798.433	46.8315	1.62314
31	motor task	analytic group	808.375	41.0025	1.335
32	motor task	analytic group	907.718	72.7076	1.38629
33	motor task	analytic group	736.571	70.5199	1.60944
35	motor task	analytic group	740.269	30.6525	2.43612
36	motor task	analytic group	776.727	69.6261	1.36399
40	motor task	analytic group	741.219	26.0657	1.87946
42	motor task	analytic group	781.551	39.0385	2.16905
44	motor task	analytic group	716.111	44.9147	1.50408
46	motor task	analytic group	696.214	83.5446	1.21345
48	motor task	analytic group	597.562	24.0065	1.23998
50	motor task	analytic group	801.958	47.3606	2.30259
51	motor task	analytic group	824.085	35.8778	1.56398
52	motor task	analytic group	1042.32	63.7805	2.22462
2	holistic tasks	holistic group	1140.36	111.465	1.95404
8	holistic tasks	holistic group	732.038	63.998	1.5716
9	holistic tasks	holistic group	728.646	33.4153	2.11349
10	holistic tasks	holistic group	685.802	26.2357	1.87132
11	holistic tasks	holistic group	880.062	76.4588	1.2934
16	holistic tasks	holistic group	827.355	40.0559	1.64694
18	holistic tasks	holistic group	916	49.9703	1.60002
19	holistic tasks	holistic group	706.736	41.099	1.48186
20	holistic tasks	holistic group	769.57	25.2033	1.66796
23	holistic tasks	holistic group	669.654	38.1987	1.82004
25	holistic tasks	holistic group	827.188	61.999	0.851945
27	holistic tasks	holistic group	674.402	155.639	0.598541
30	holistic tasks	holistic group	624.604	19.9909	1.89712
34	holistic tasks	holistic group	715.153	58.0558	1.77508
37	holistic tasks	holistic group	735.769	31.1998	1.43748
38	holistic tasks	holistic group	702.988	18.5215	2.71155
39	holistic tasks	holistic group	768.497	57.5815	1.44624
41	holistic tasks	holistic group	739.82	44.8006	1.51093
43	holistic tasks	holistic group	559.098	22.8601	0.800259
45	holistic tasks	holistic group	802.173	40.22	1.78306
47	holistic tasks	holistic group	828.056	83.8046	1.20568
1	holistic tasks	analytic group	758.728	28.8402	2.03091
3	holistic tasks	analytic group	913.858	30.6939	1.66241
5	holistic tasks	analytic group	914.362	52.2381	1.9746
6	holistic tasks	analytic group	705.503	45.3701	2.03196
21	holistic tasks	analytic group	1098.48	47.795	2.10221
22	holistic tasks	analytic group	689.297	42.6219	0.956596
24	holistic tasks	analytic group	703.779	59.0164	1.67032
28	holistic tasks	analytic group	765.847	32.0723	1.56162
29	holistic tasks	analytic group	850.022	32.368	1.63446
31	holistic tasks	analytic group	842.711	52.7021	1.52301
32	holistic tasks	analytic group	865.109	50.0247	1.97037
33	holistic tasks	analytic group	764.99	62.2656	1.71374
35	holistic tasks	analytic group	721.253	36.1879	1.67586
36	holistic tasks	analytic group	726.667	75.3	1.24934
40	holistic tasks	analytic group	697.176	25.3736	1.4535
42	holistic tasks	analytic group	724.038	28.5276	1.94133
44	holistic tasks	analytic group	727.76	33.8693	1.77425
46	holistic tasks	analytic group	740.951	46.3144	1.89468
48	holistic tasks	analytic group	621.124	29.774	1.58522
50	holistic tasks	analytic group	730.224	37.2471	2.00747
51	holistic tasks	analytic group	830.142	35.4607	2.14137
52	holistic tasks	analytic group	1110.35	78.6163	1.83962
2	analytic tasks	holistic group	1088.77	150.678	2.09959
8	analytic tasks	holistic group	733.064	73.344	1.54117
9	analytic tasks	holistic group	701.791	35.3303	1.87284
10	analytic tasks	holistic group	668.936	25.3531	1.71431
11	analytic tasks	holistic group	857.513	82.0023	1.24859
16	analytic tasks	holistic group	822.705	45.6531	1.52606
18	analytic tasks	holistic group	948.896	41.4455	1.54264
19	analytic tasks	holistic group	692.894	41.5514	1.43065
20	analytic tasks	holistic group	752.261	24.1571	1.51102
23	analytic tasks	holistic group	689.099	36.8097	2.03552
25	analytic tasks	holistic group	793.472	77.5776	1.30287
27	analytic tasks	holistic group	625.519	107.028	0.64889
30	analytic tasks	holistic group	645.138	25.7816	1.07519
34	analytic tasks	holistic group	681.67	41.5211	1.59463
37	analytic tasks	holistic group	752.7	29.8887	1.37928
38	analytic tasks	holistic group	735.407	31.5228	1.52502
39	analytic tasks	holistic group	751.397	58.2775	1.53873
41	analytic tasks	holistic group	732.42	42.9694	1.64417
43	analytic tasks	holistic group	532.251	12.7772	1.42112
45	analytic tasks	holistic group	845.241	54.7857	2.02772
47	analytic tasks	holistic group	832.623	94.0122	1.02735
1	analytic tasks	analytic group	756.792	44.3359	1.57918
3	analytic tasks	analytic group	917.514	37.2469	1.54045
5	analytic tasks	analytic group	923.203	62.1575	1.59163
6	analytic tasks	analytic group	702.663	47.464	1.84162
21	analytic tasks	analytic group	1120.77	59.5225	2.47293
22	analytic tasks	analytic group	673.047	29.6486	1.34813
24	analytic tasks	analytic group	704.466	61.2693	1.24368
28	analytic tasks	analytic group	768.214	40.4625	1.20461
29	analytic tasks	analytic group	827.9	34.3413	1.61545
31	analytic tasks	analytic group	787.836	43.4432	1.24821
32	analytic tasks	analytic group	862.391	58.7436	1.7322
33	analytic tasks	analytic group	786.007	61.3239	1.83722
35	analytic tasks	analytic group	720.416	45.334	1.14715
36	analytic tasks	analytic group	696.145	54.3584	1.11233
40	analytic tasks	analytic group	691.883	31.1192	1.35069
42	analytic tasks	analytic group	715.138	32.2094	1.68958
44	analytic tasks	analytic group	714.462	32.573	1.69152
46	analytic tasks	analytic group	748.495	54.6242	1.78436
48	analytic tasks	analytic group	630.005	25.73	1.48067
50	analytic tasks	analytic group	805.343	52.4444	1.71209
51	analytic tasks	analytic group	814.837	32.4941	1.9969
52	analytic tasks	analytic group	1148.32	64.7124	2.12987
